# Supplementary material for: A LiFSI–LiTFSI binary-salt electrolyte to achieve high capacity and cycle stability for a Li–S battery
Source: Royal Society of Chemistry journal article supplement (doi:10.1039/c4cc06666a), 2014-01-01
Supplement: c4cc06666a1.pdf [file c4cc06666a1.pdf]

## LiFSI-LiTFSI binary-salt electrolyte to achieve high capacity and cycle stability for Li-S battery\*\*

J. J. Hu, G. K. Long, S. Liu, G. R. Li and X. P. Gao \*

**Preparation and characterization of the sulfur-based composite.** High sulfur contented composite was employed as the active substance of the testing electrode with a polypyrrole (PPy) coated carbon matrix as sulfur carrier. The matrix was prepared by anolyte electropolymerization inspired by the literature.<sup>1</sup> Carbon (BPX70, Cabot Corporation) and multiwalled carbon nanotubes (Nanjing XF Nano Inc.) were dispersed in an aqueous solution containing 1 M H<sub>2</sub>SO<sub>4</sub> and pyrrole monomer under ultrasonic to form the anolyte. The catholyte was 1 M H<sub>2</sub>SO<sub>4</sub>. A separator was applied between the anolyte and the catholyte. A current of 400 μA was applied to initiate the polymerization. The resultant was washed and dried, then mixed with sublimed sulfur (chemical grade) in a weight ratio of 1:4 by a planetary ball miller at 180 rpm for 1 h. The as-prepared composite was characterized by Fourier transform infrared (FTIR) spectroscopy (Tensor 27, Bruker), powder X-ray diffraction (XRD, Rigaku MiniFlex II), scanning electron microscopy (SEM, Hitachi S-4800), and transmission electron microscopy (TEM, FEI Tecnai G2 F20). The sulfur content was measured by thermogravimetry (TGA, Mettler Toledo, TGA/DSC 1) in 50 mL·min<sup>-1</sup> Ar flow at a heating rate of 10 °C·min<sup>-1</sup> from 30 to 500 °C. The cycled anodes and cathodes were retrieved from cells after 100 cycles at 200 mA·g<sup>-1</sup>-composite, scoured with DOL/DME (1:1 by volume) and dried in an argon-filled glove box. The resultants were cut into pieces, pasted on the sample holder and transferred under argon atmosphere into the transfer vessel for SEM observation.

**Preparation and characterization of the electrolytes.** Different electrolytes were prepared by dissolving proper amount of bis(fluorosulfonyl)imide (LiFSI, Guotaihuarong, Zhangjiagang) or/and bis(trifluoromethanesulfonyl)imide (LiTFSI, Acros) in the mixture (1:1 in volume) of 1,3-dioxolane (DOL, J&K) and 1,2-dimethoxyethane (DME, J&K) in an argon-filled glove box. The testing electrolytes were 1 M, 1.5 M, 2 M, 2.5 M, 3 M LiFSI (DOL/DME), 1 M, 1.5 M, 2 M, 2.5 M, 3 M LiTFSI (DOL/DME), and two ether-mixtures containing 1 M LiFSI + 0.5 M LiTFSI, and 0.5 M LiFSI + 1 M LiTFSI, respectively. The ionic conductivity of electrolyte was measured by a conductivity meter (Shengbang, Tianjin) at 25 °C. The shear viscosity (η) of the electrolyte was measured on a viscometer (Brookfield, DV2T) at 25 °C. All the measurements were performed more than twice to insure the reliability.

**Electrochemical measurement.** The active substance was blended with carbon black (Super P Li) and poly(vinylidene difluoride) (PVdF) in a weight ratio of 7:2:1 under vigorous stir for 10 h with N-methyl-2-pyrrolidone (NMP) as the dispersant. The obtained slurry was cast on carbon-coated Al foil then dried overnight at 60 °C. The resultant cathode was cut into small round pieces (12 mm in diameter). The testing cells (model R2032) were assembled in an argon-filled glove box, with metallic lithium foil as the counter and reference electrode, microporous polypropylene film (Celgard 2300) as the separator and the as-prepared sulfur electrode (lithium foil for the potential stair-step measurement) as the cathode. The galvanostatic discharge/charge measurements were conducted at different current density between 1.0~3.0 V on a LANHE-CT2001A battery testing

system (Wuhan Jinnuo, China). The cyclic voltammetry (CV) was operated on a Solartron SI 1287 electrochemical interface with a scan rate of  $0.1 \text{ mV s}^{-1}$  in the potential range of 1.0~3.0 V vs. Li/Li<sup>+</sup>. The electrochemical impedance spectroscopy (EIS) measurements were performed using a Zahner IM6Ex electrochemical workstation in the frequency range of 100 kHz to 100 mHz with an exciting potential amplitude of 5 mV.

**Reference:**

1. M. Duduta, B. Ho, V. C. Wood, P. Limthongkul, V. E. Brunini, W. C. Carter and Y. M. Chiang, *Adv. Energy Mater.*, 2011, **1**, 511.

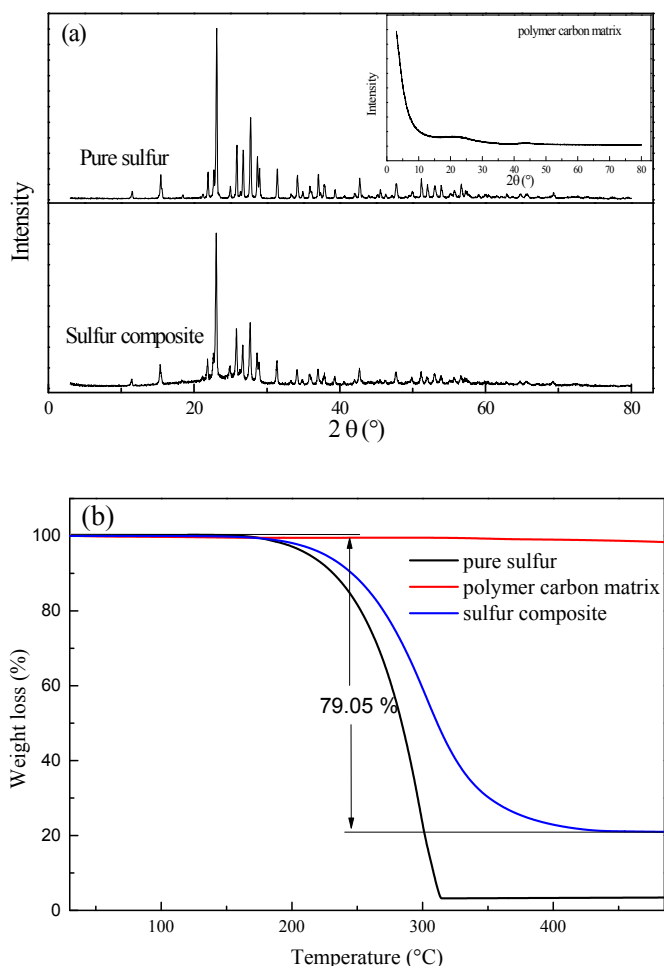

**Fig. S1.** (a) XRD patterns and (b) TG of sulfur, the polymer coating carbon matrix and the sulfur based composite.

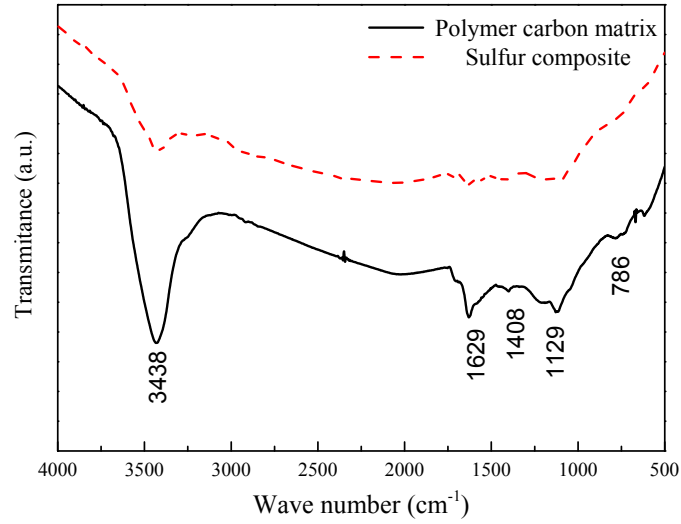

**Fig. S2.** FTIR of the polymer coating carbon matrix and the sulfur based composite.

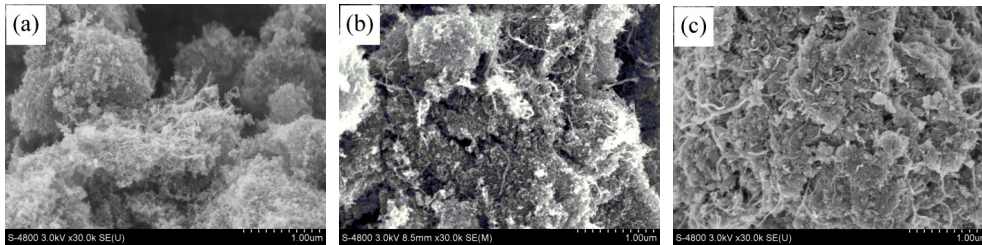

**Fig. S3.** SEM images of (a) the conductive mixed carbon matrix, (b) the polymer coating carbon matrix and (c) the sulfur based composite.

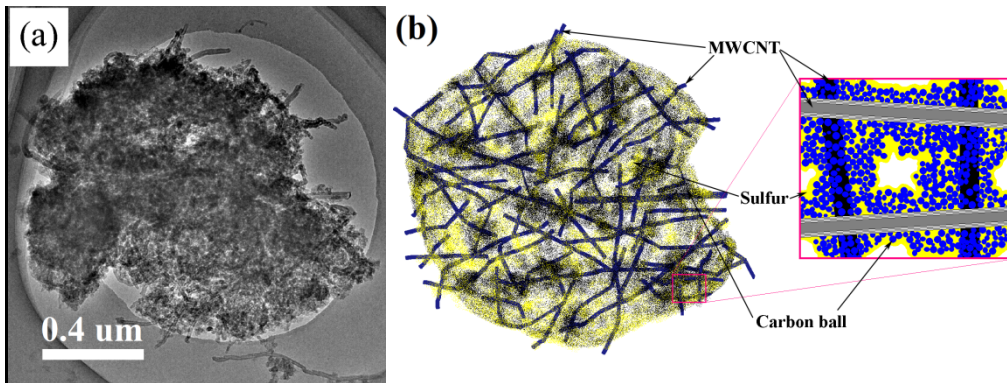

**Fig. S4.** (a) TEM image and (b) the schematic structure of the sulfur based composite.

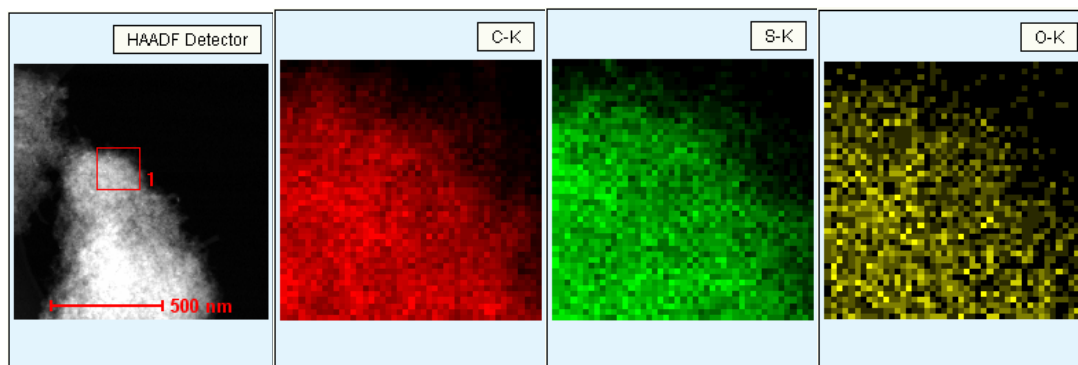

**Fig. S5.** STEM image and elemental mapping images of carbon, sulfur and oxygen of the region as noted by the red square in the sulfur based composite.

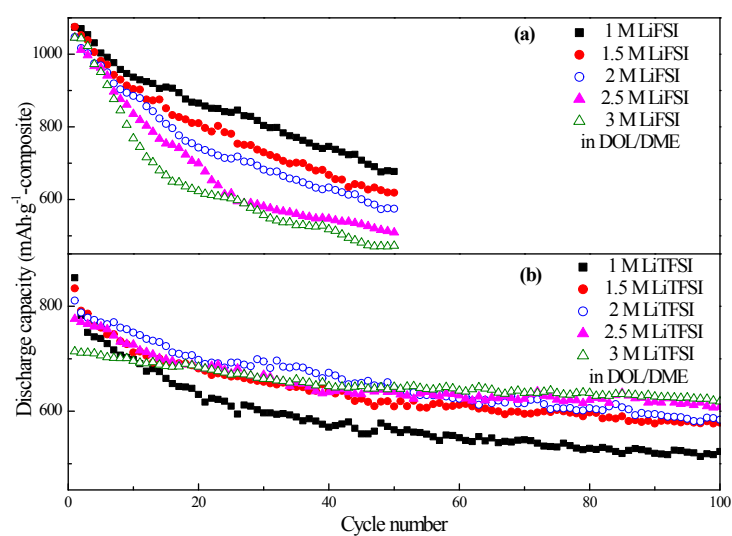

**Fig. S6.** The cycle performance of the sulfur cathode in different concentrated electrolytes with (a) LiFSI and (b) LiTFSI at 200 mA g<sup>-1</sup>-composite.

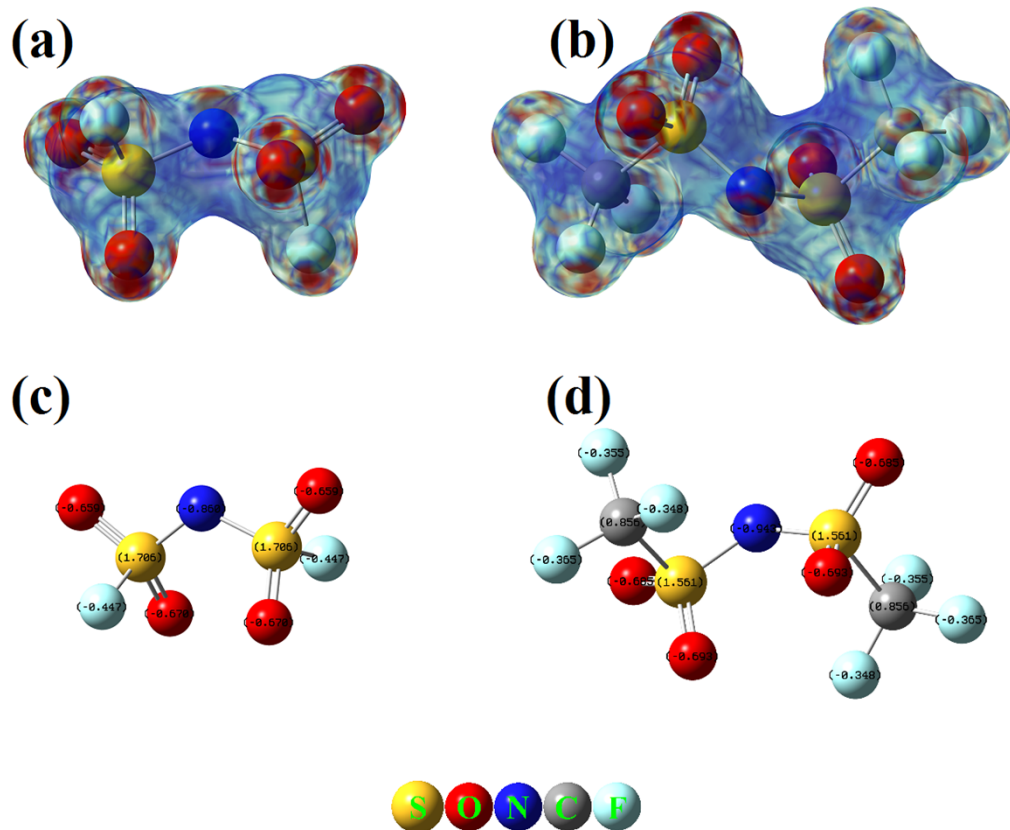

**Fig. S7.** Calculated Electronic Static Potential (ESP) and charges of sulfur and nitrogen atoms of (a) [FSI]<sup>-</sup> and (b) [TFSI]<sup>-</sup> by Gaussian. The blue coating regions (ESP) indicate positive charge distribution and the red ones suggest negative. Mulliken atomic charges of (c) [FSI]<sup>-</sup> and (d) [TFSI]<sup>-</sup> calculated from a Gaussian software.

**Table S1.** The electrochemical parameters simulated from EIS in Fig. 2.

| electrolyte              | $R_s$<br>(ohm*mg) | $R_1$<br>(ohm*mg) | $R_{ct}$<br>(ohm*mg) | $W_o-R$<br>(ohm*mg) |
|--------------------------|-------------------|-------------------|----------------------|---------------------|
| 1.5 M LiFSI              |                   |                   |                      |                     |
| 1st                      | 2.98              | 6.68              | 19.37                | 13.87               |
| 10th                     | 4.04              | 17.76             | 20.87                | 23.34               |
| 50th                     | 5.97              | 37.42             | 24.51                | 38.06               |
| 100th                    | 6.67              | 77.82             | 44.05                | 86.08               |
| 1M LiFSI +0.5M LiTFSI    |                   |                   |                      |                     |
| 1st                      | 3.91              | 76.95             | 5.00                 | 21.09               |
| 10th                     | 4.45              | 36.23             | 4.16                 | 32.13               |
| 50th                     | 5.78              | 35.50             | 3.81                 | 28.03               |
| 100th                    | 6.54              | 34.88             | 4.78                 | 25.47               |
| 0.5 M LiFSI + 1 M LiTFSI |                   |                   |                      |                     |
| 1st                      | 4.01              | 32.22             | 5.71                 | 26.92               |
| 10th                     | 4.79              | 32.88             | 8.17                 | 28.25               |
| 50th                     | 6.65              | 25.36             | 8.39                 | 82.69               |
| 100th                    | 6.99              | 31.18             | 12.66                | 91.93               |
| 1.5 M LiTFSI             |                   |                   |                      |                     |
| 1st                      | 5.11              | 25.97             | 5.31                 | 11.52               |
| 10th                     | 6.42              | 18.15             | 9.61                 | 25.23               |
| 50th                     | 6.81              | 15.71             | 19.58                | 30.54               |
| 100th                    | 7.40              | 12.59             | 27.50                | 74.13               |

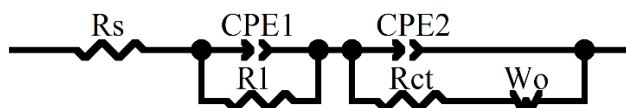

The fitting equivalent circles in which  $R_s$  is solution resistance,  $R_{ct}$  is charge-transfer resistance, CPE is constant phase element,  $R_1$  is the resistance from the insoluble  $Li_2S/Li_2S_2$  film, and  $W_o$  is assigned to the semi-infinite Warburg diffusion.

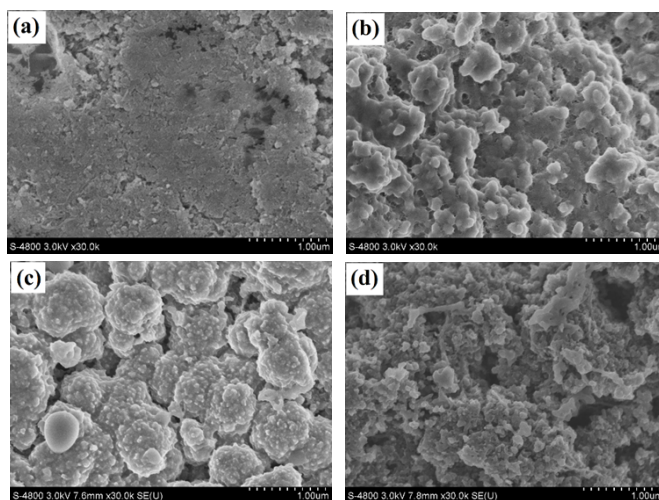

**Fig. S8.** SEM images of the sulfur cathode surface. (a) fresh cathode, and cycled cathodes after 100 cycles in (b) 1.5 M LiFSI electrolyte, (c) 1 M LiFSI + 0.5 M LiTFSI electrolyte, and (d) 1.5 M LiTFSI electrolyte.

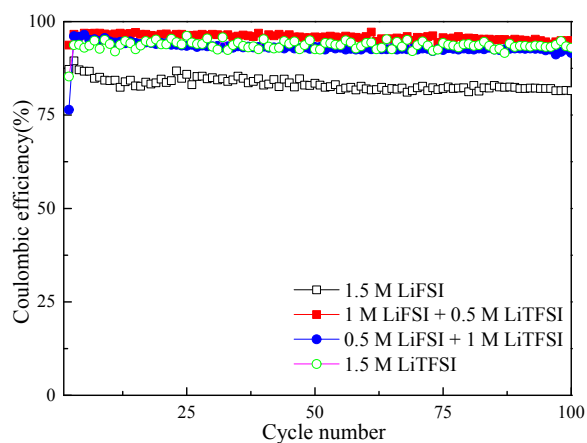

**Fig. S9.** The Coulombic efficiency of the sulfur cathode in various electrolytes

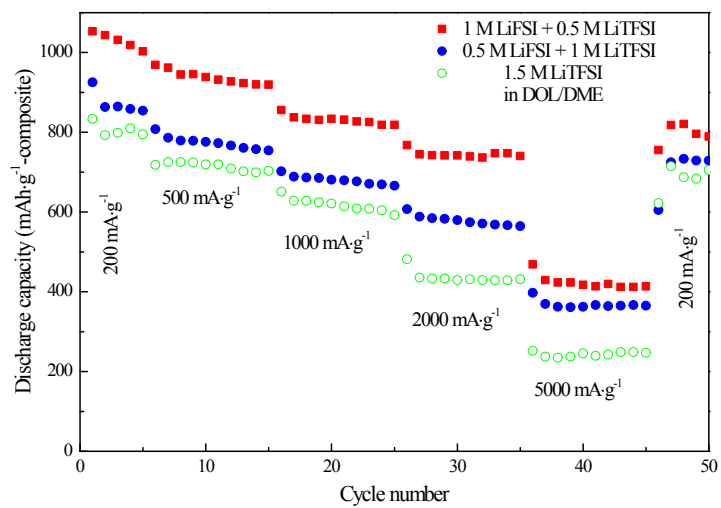

**Fig. S10.** The high-rate capability of the sulfur cathode in various electrolytes
